# Supplementary material for: Factors Associated with Extended Length of Stay for Paediatric Mental Health Presentations to Emergency Departments in South Western Sydney, Australia
Source: Preprints.org preprint supplement (doi:10.20944/preprints202302.0008.v1), 2023-02-01
Supplement: Supplementary file 1 [file supplementary]

Supplementary table

**Table S1.** Distribution of deliberate self-harm (DSH) related ED presentation by Triage class

|  | **DSH related presentation** | |
| --- | --- | --- |
| **Triage** | **No (N=5126)** | **Yes (N=2283)** |
| 1-2 | 445 (8.68%) | 195 (8.54%) |
| 3 | 3262 (63.6%) | 1658 (72.6%) |
| 4-5 | 1419 (27.7%) | 430 (18.8%) |
